# Supplementary material
Source: PubMed Central journal article supplement (PMC3119474)
Supplement: 485460.f1.pdf [file 485460.f1.pdf]

## Supplementary Material

**Fig 1S.** Average number of eggs laid, average proportion of eggs hatched and associated standard error for crosses involving *D. texana* (te) and *D. novamexicana* (no) (A); *D. texana* (te) and *D. lummei* (lu) (B) and *D. lummei* (lu) and *D. novamexicana* (no) (C). n: the number of females tested. (Out) the outbred population strain used. Shared letters above columns indicate that averages are not statistically different.

**Table 1S.** Summary of results for egg laying in heterospecific crosses among species of the virilis subgroup. N indicates that the number of eggs laid is not different from those laid by the female in a conspecific cross. Y indicates that the number of eggs laid is higher than eggs laid by conspecific mated females.

**Table 2S.** Summary of results for eggs hatched in heterospecific crosses among species of the virilis subgroup. Y indicates significant differences, with the proportion of eggs hatched from a heterospecific cross being lower than the proportion of eggs hatched from conspecific crosses. N indicates no significant differences between eggs hatched in heterospecific and at least one conspecific cross.

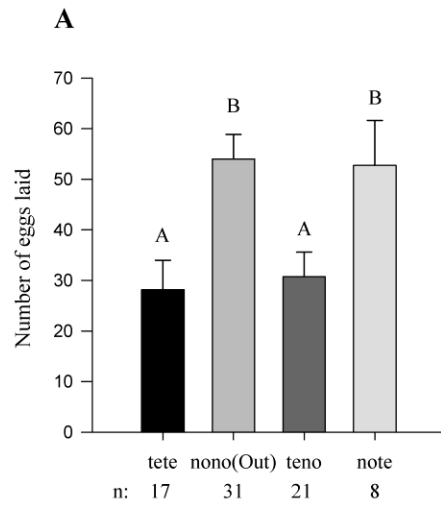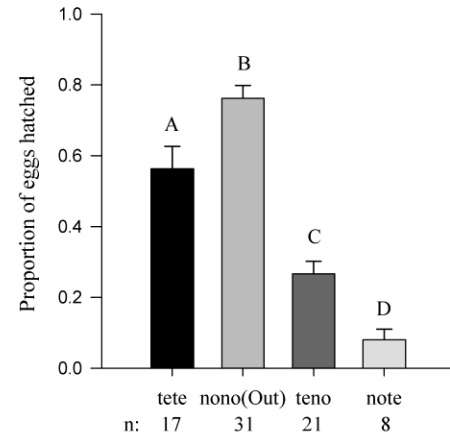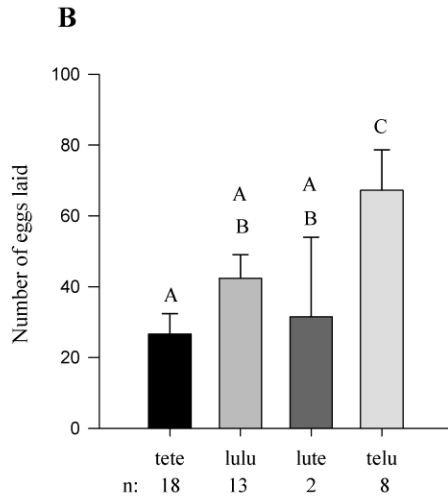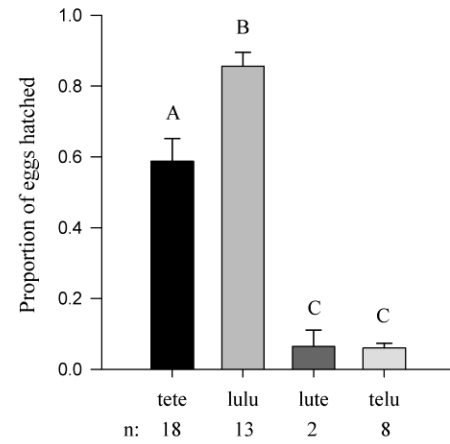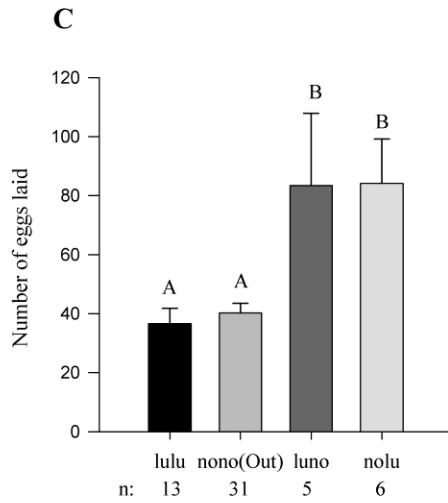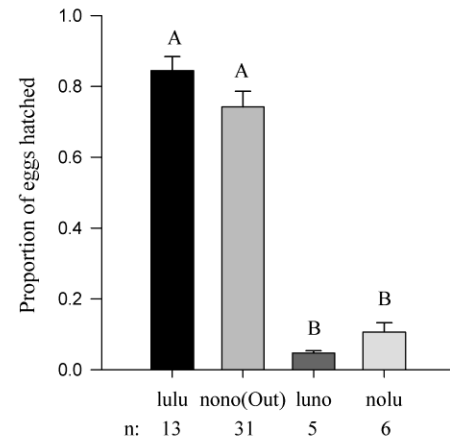

**Table 1S**

| <div> <div>♀</div> <div>♂</div> </div> | <i>D. virilis</i> | <i>D. lummei</i> | <i>D. a. texana</i> | <i>D. novamexicana</i> |
|----------------------------------------|-------------------|------------------|---------------------|------------------------|
| <i>D. virilis</i>                      | —                 | —                | —                   | —                      |
| <i>D. lummei</i>                       | N                 | —                | Y                   | Y                      |
| <i>D. a. texana</i>                    | N                 | N                | —                   | N                      |
| <i>D. novamexicana</i>                 | N                 | Y                | N                   | —                      |

**Table 2S**

| <div> <div>♀</div> <div>♂</div> </div> | <i>D. virilis</i> | <i>D. lummei</i> | <i>D. a. texana</i> | <i>D. novamexicana</i> |
|----------------------------------------|-------------------|------------------|---------------------|------------------------|
| <i>D. virilis</i>                      | —                 | —                | —                   | —                      |
| <i>D. lummei</i>                       | N                 | —                | Y                   | Y                      |
| <i>D. a. texana</i>                    | Y                 | Y                | —                   | Y                      |
| <i>D. novamexicana</i>                 | Y                 | Y                | Y                   | —                      |
